# Supplementary material
Source: PubMed Central journal article supplement (PMC7262220)

**Supplemental Table 1: EORTC QLQ-C30 mean difference in scores from baseline**

|                        | Cycle 2 – Baseline |         | Cycle 3 – Baseline |         | Cycle 4 – Baseline |         | 3 month FU – Baseline |         |
|------------------------|--------------------|---------|--------------------|---------|--------------------|---------|-----------------------|---------|
| Number evaluable       | 46                 |         | 37                 |         | 30                 |         | 26                    |         |
|                        | mean (95% CI)      | p-value | mean (95% CI)      | p-value | mean (95% CI)      | p-value | mean (95% CI)         | p-value |
| Global health status   | 6 (0 to 11)        | 0.037   | 7 (1 to 13)        | 0.026   | 5 (-2 to 11)       | 0.155   | 2 (-5 to 9)           | 0.553   |
| Functional scales      |                    |         |                    |         |                    |         |                       |         |
| Physical functioning   | -1 (-6 to 3)       | 0.627   | -1 (-6 to 4)       | 0.769   | 1 (-4 to 6)        | 0.789   | -2 (-7 to 4)          | 0.506   |
| Role functioning       | -3 (-10 to 4)      | 0.400   | -2 (-10 to 6)      | 0.672   | -5 (-13 to 3)      | 0.233   | -11 (-20 to -2)       | 0.019   |
| Emotional functioning  | 6 (2 to 10)        | 0.001   | 3 (-1 to 8)        | 0.094   | 5 (0 to 9)         | 0.040   | 4 (-1 to 9)           | 0.084   |
| Cognitive functioning  | 3 (-2 to 9)        | 0.204   | 4 (-2 to 10)       | 0.197   | 4 (-2 to 10)       | 0.173   | 4 (-3 to 10)          | 0.277   |
| Social functioning     | 3 (-4 to 9)        | 0.445   | -5 (-12 to 2)      | 0.154   | -3 (-11 to 4)      | 0.380   | -5 (-13 to 3)         | 0.238   |
| Symptom scales / items |                    |         |                    |         |                    |         |                       |         |
| Fatigue                | -3 (-9 to 3)       | 0.309   | -6 (-12 to 1)      | 0.071   | -4 (-10 to 3)      | 0.272   | -5 (-12 to 3)         | 0.210   |
| Nausea and vomiting    | 1 (-5 to 7)        | 0.713   | 3 (-3 to 10)       | 0.287   | 3 (-4 to 10)       | 0.420   | 1 (-7 to 8)           | 0.856   |

|               |                 |       |                 |       |                 |       |               |       |
|---------------|-----------------|-------|-----------------|-------|-----------------|-------|---------------|-------|
| Pain          | -12 (-19 to -5) | 0.002 | -11 (-19 to -3) | 0.008 | -12 (-20 to -3) | 0.006 | -4 (-13 to 5) | 0.329 |
| Dyspnoea      | -4 (-10 to 2)   | 0.227 | 1 (-6 to 8)     | 0.785 | -2 (-9 to 6)    | 0.677 | -1 (-9 to 7)  | 0.862 |
| Insomnia      | -12 (-19 to -4) | 0.003 | -5 (-14 to 3)   | 0.201 | -11 (-19 to -2) | 0.019 | -9 (-18 to 0) | 0.061 |
| Appetite loss | -7 (-15 to 2)   | 0.138 | -5 (-14 to 5)   | 0.342 | 4 (-6 to 14)    | 0.439 | -3 (-13 to 8) | 0.638 |
| Constipation  | -13 (-22 to -4) | 0.003 | -9 (-19 to 0)   | 0.044 | -3 (-13 to 7)   | 0.532 | -3 (-14 to 7) | 0.549 |
| Diarrhoea     | 5 (0 to 10)     | 0.044 | 1 (-4 to 6)     | 0.695 | 2 (-3 to 8)     | 0.376 | 2 (-4 to 8)   | 0.509 |

---

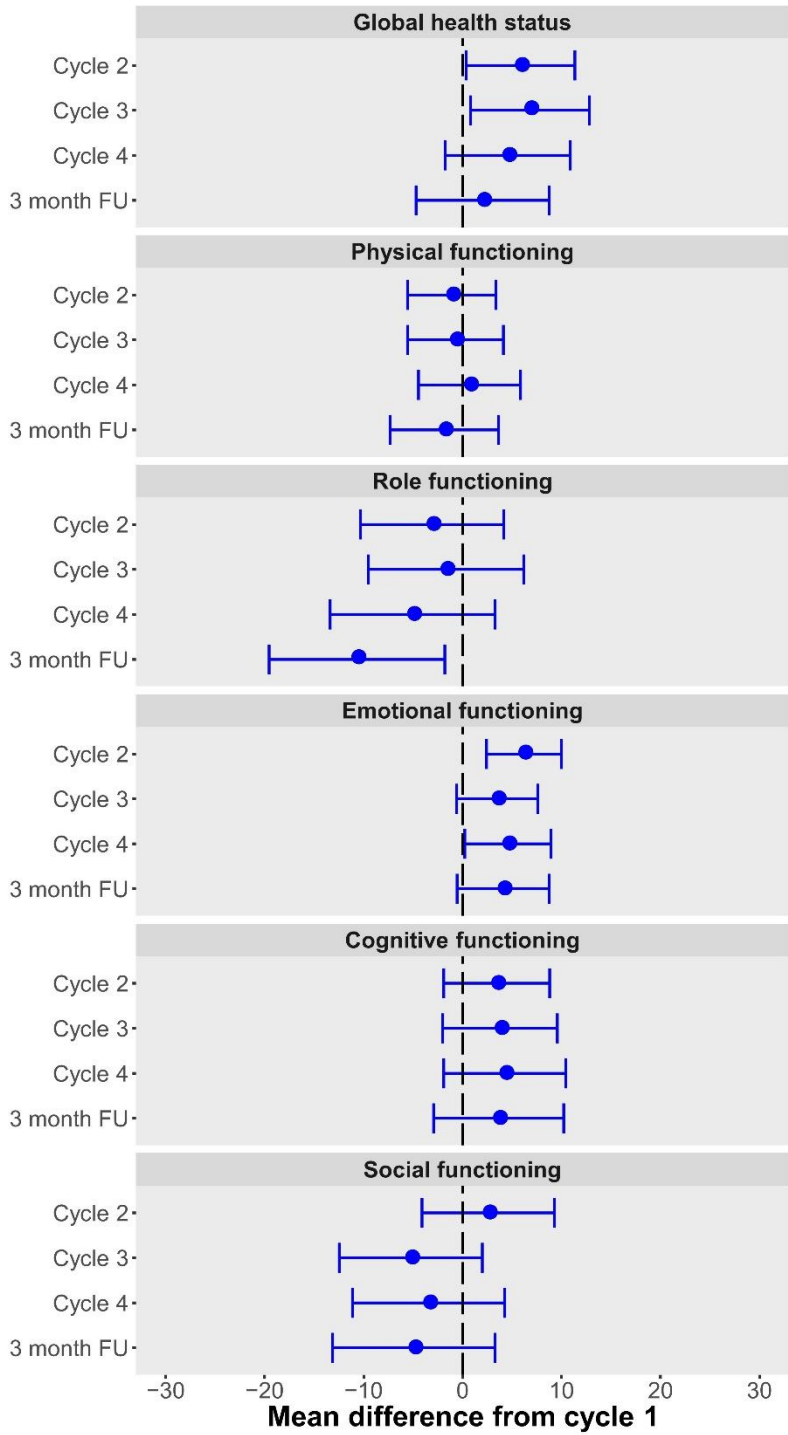

**Supplemental Figure 1: Health-related Quality of Life assessment using EORTC QLQ-C30**

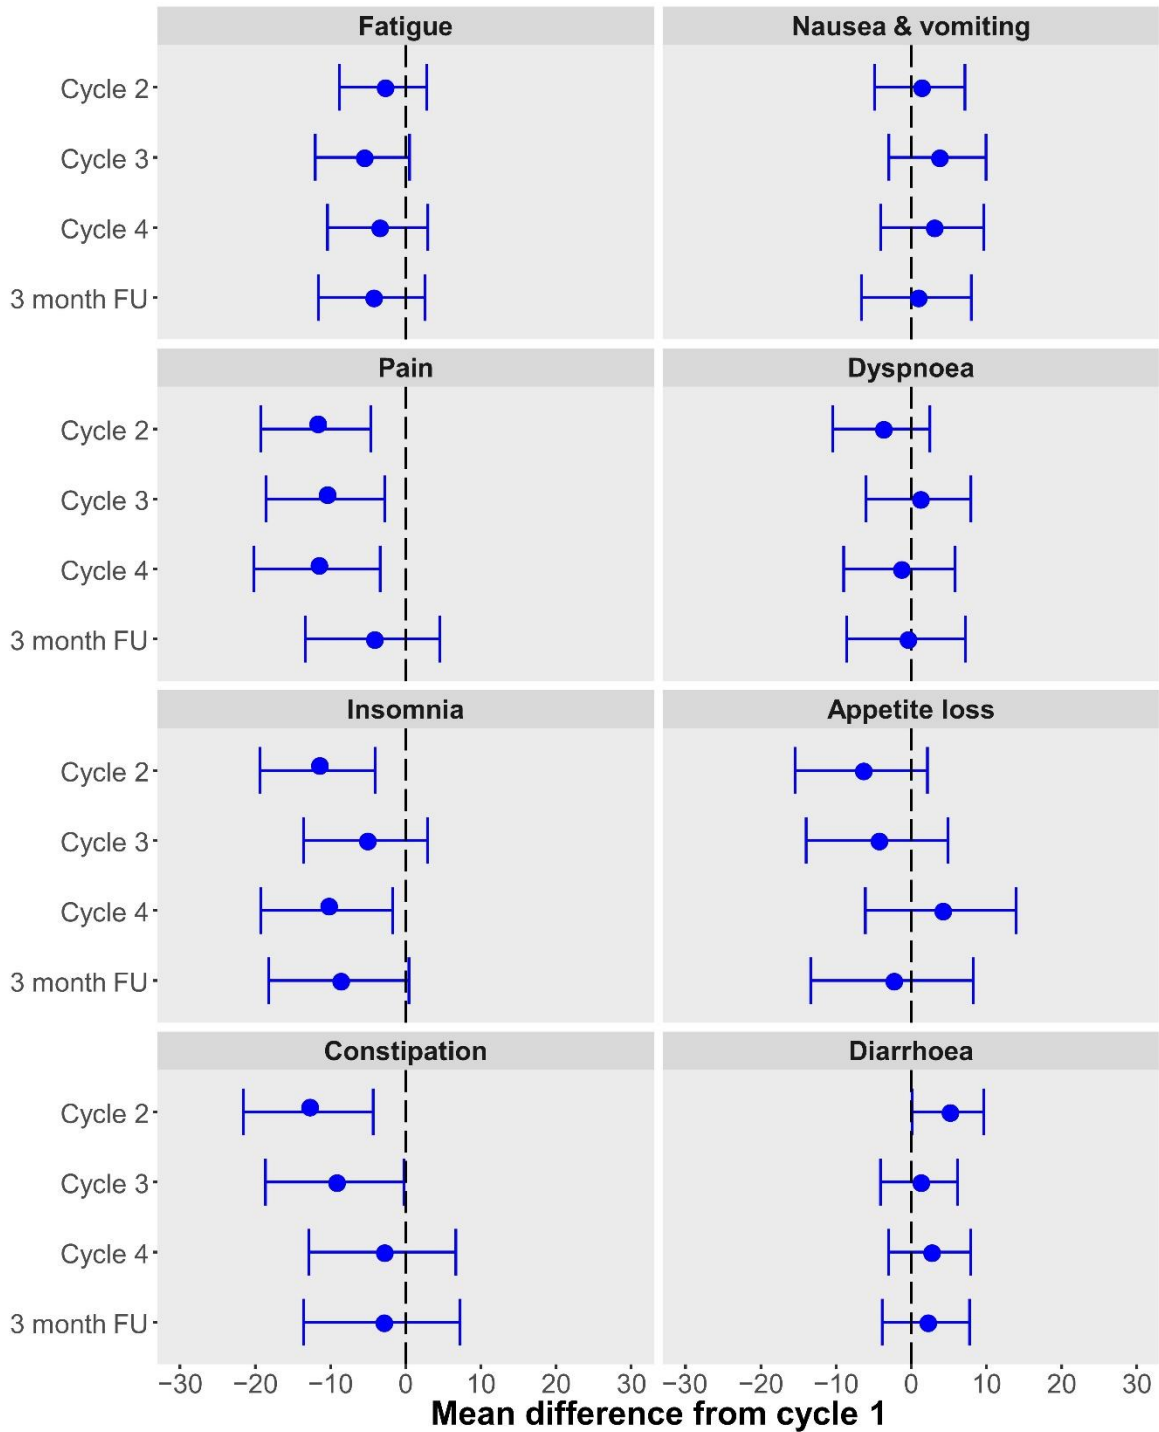

**Supplemental Figure 2: Health-related Quality of Life assessment using EORTC QLQ-C30**

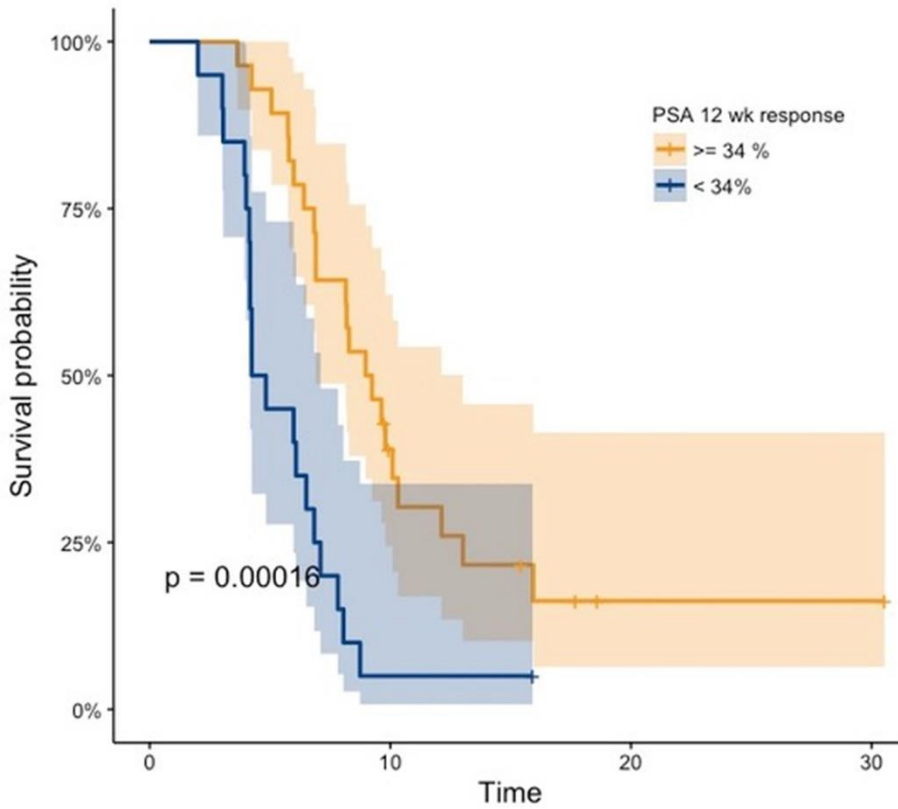

**Supplemental Figure 3: Kaplan-Meier Overall Survival Curve by PSA response at 12 weeks with optimal cut-off of 34%. Hazard ratio increases 1.088 per 10% (95% CI 1.049-1.129).**

**Supplemental Figure 4:** Kaplan-Meier Overall Survival Curve in 16 patients who were excluded on the basis of low PSMA-expression or discordant FDG-avid disease compared to the 50 patients who were treated with 95% confidence interval shaded. Median OS was 2.5 months compared to 13.3 months.

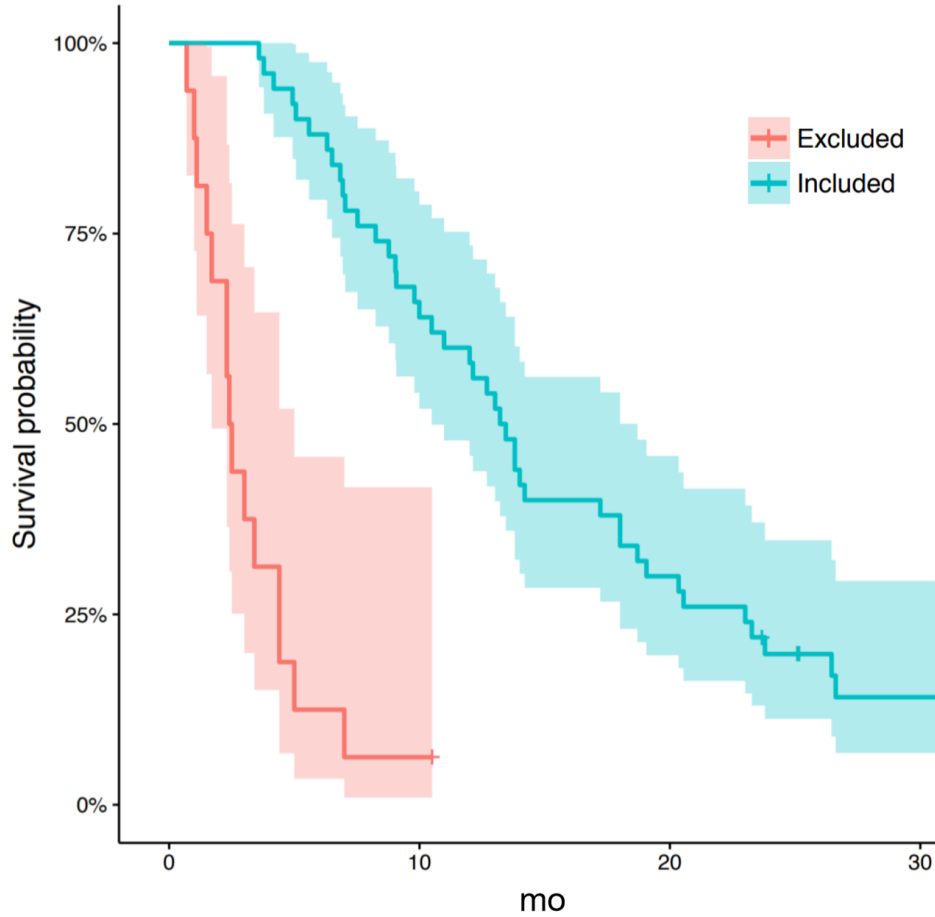

Supplement: jnm236414SupplementalData.pdf [file jnm236414SupplementalData.pdf]
